# Supplementary material
Source: publisher figshare collection journal article supplement (https://acs.figshare.com/ndownloader/files/4620337)
Supplement: Supplementary file 1 [file 4620337]

## Supporting Information

### Temporal Control of Self-Oscillation for Microgels by Crosslinking Network Structure

*Daisuke Suzuki<sup>†</sup> and Ryo Yoshida<sup>\*†‡</sup>*

<sup>†</sup>Department of Materials Engineering, Graduate School of Engineering, The University of Tokyo, 7-3-1 Hongo, Bunkyo-ku, Tokyo 113-8656, Japan

<sup>‡</sup>PRESTO, Japan Science and Technology Agency, 4-1-8 Honcho Kawaguchi, Saitama, Japan

\* Author to whom correspondence should be addressed.

E-mail: ryo@cross.t.u-tokyo.ac.jp

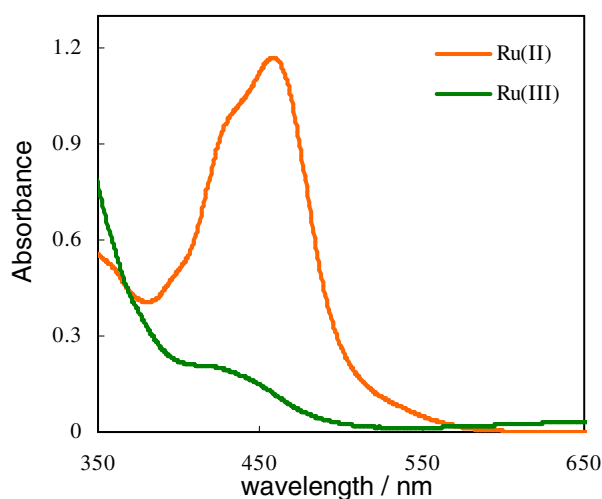

**SI Figure 1.** Absorption spectra for Ru(bpy)<sub>3</sub> monomer for the reduced Ru<sup>II</sup> state in 1 mM Ce<sup>III</sup> and 0.3 M HNO<sub>3</sub> solution (orange line), and the oxidized Ru<sup>III</sup> state in 1 mM Ce<sup>IV</sup> and 0.3 M HNO<sub>3</sub> solution (green line). Each Ru(bpy)<sub>3</sub> monomer concentration was 0.01 wt.%.

As shown in SI Figure 1, the Ru(bpy)<sub>3</sub> complex has different absorption spectra in the reduced Ru<sup>II</sup> state and the oxidized Ru<sup>III</sup> state as an inherent property. The solution has isosbestic point at 570 nm. In this study, our aim is to detect the optical transmittance changes based on swelling/deswelling changes of the microgels. Therefore, the 570 nm wavelength was used for detecting the swelling/deswelling oscillation of the microgels.

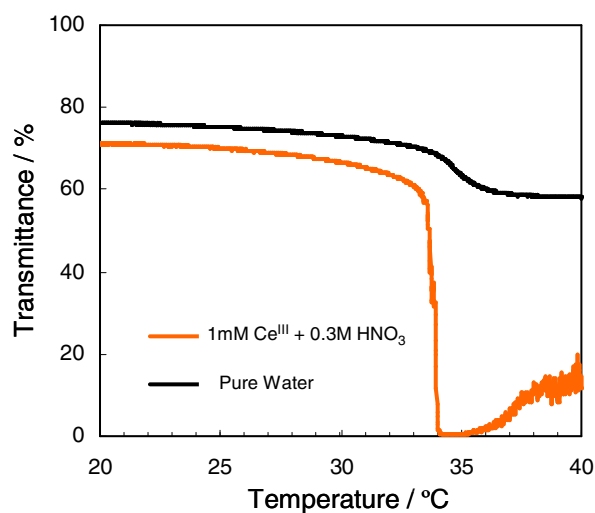

**SI Figure 2.** Temperature dependence of optical transmittance for the Ru(bpy)<sub>3</sub> copolymerized pNIPAm microgels [NRu0.1(1)] under the different conditions; the reduced state Ru<sup>II</sup> in 1mM Ce<sup>III</sup> and 0.3M HNO<sub>3</sub> solution (orange line), and the reduced state Ru<sup>II</sup> in pure water (black line). The dispersion concentration was 0.1 wt% in both cases. The 570 nm wavelength was used for the measurement. The solutions were heated at a rate of 1 °C/min with a constant stirring.

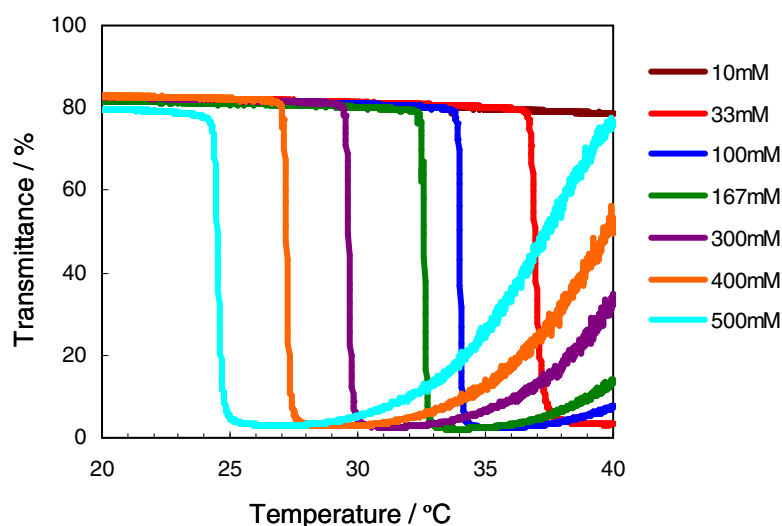

**SI Figure 3.** Temperature dependence of optical transmittance for the Ru(bpy)<sub>3</sub> copolymerized pNIPAm microgels [NRu1(10)] dispersed in different NaBrO<sub>3</sub> solutions. The microgels were not flocculated at low NaBrO<sub>3</sub> concentration (10 mM). The dispersion concentration was 0.1 wt% in all cases. The 570 nm wavelength was used for the measurement. The solutions were heated at a rate of 1 °C/min with a constant stirring. Note that cloud point sifted to lower temperatures with increasing [NaBrO<sub>3</sub>] (i.e., 36.6 °C in 33 mM, 33.8 °C in 100 mM, 32.4 °C in 167 mM, 29.4 °C in 300 mM, 27.0 °C in 400 mM, and 24.3 °C in 500 mM).

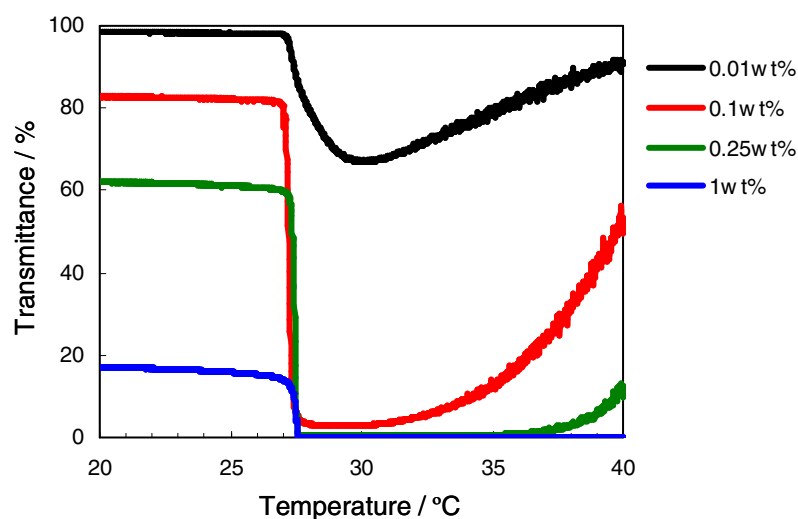

**SI Figure 4.** Temperature dependence of optical transmittance for the Ru(bpy)<sub>3</sub> copolymerized pNIPAm microgels [NRu1(10)] in 400 mM NaBrO<sub>3</sub> solution measured at different microgel dispersion concentrations. The 570 nm wavelength was used for the measurement. The solutions were heated at a rate of 1 °C/min with a constant stirring. Different from [NaBrO<sub>3</sub>] dependence, microgel concentration did not affect cloud point so much (i.e., 27.2 °C in 0.01 wt%, 27.1 °C in 0.1 wt%, 27.3 °C in 0.25 wt%, and 27.3 °C in 1 wt%).

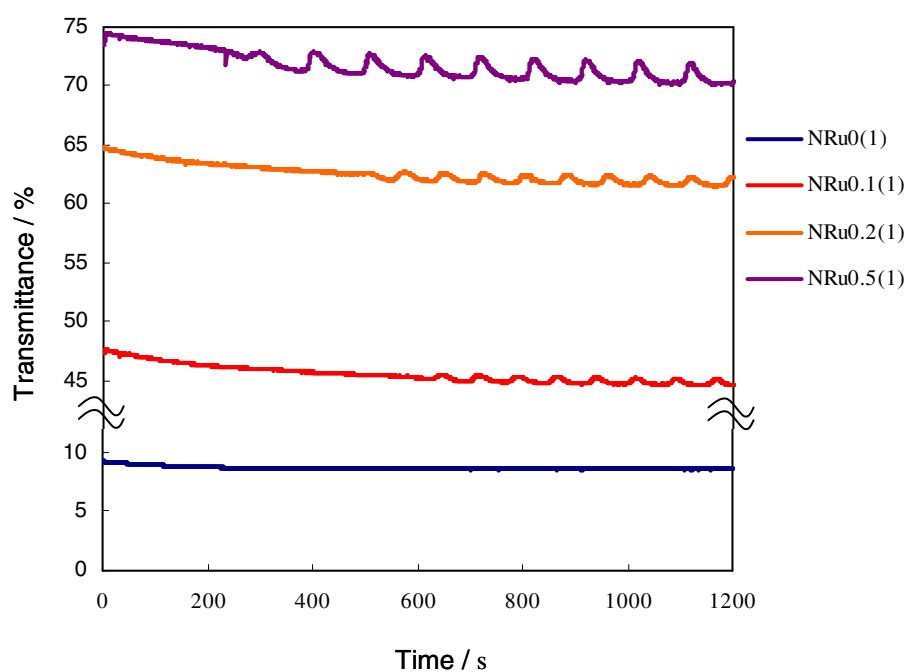

**SI Figure 5.** Self-oscillating profiles of optical transmittance for NRu0.1(1) (red line), NRu0.2(1) (orange line), NRu0.5(1) (purple line), and control NRu0(1) microgels (blue line). The microgels (0.25-wt%) were dispersed in the aqueous solutions containing MA (62.5 mM), NaBrO<sub>3</sub> (84 mM), and HNO<sub>3</sub> (0.3 M) at 25 °C.

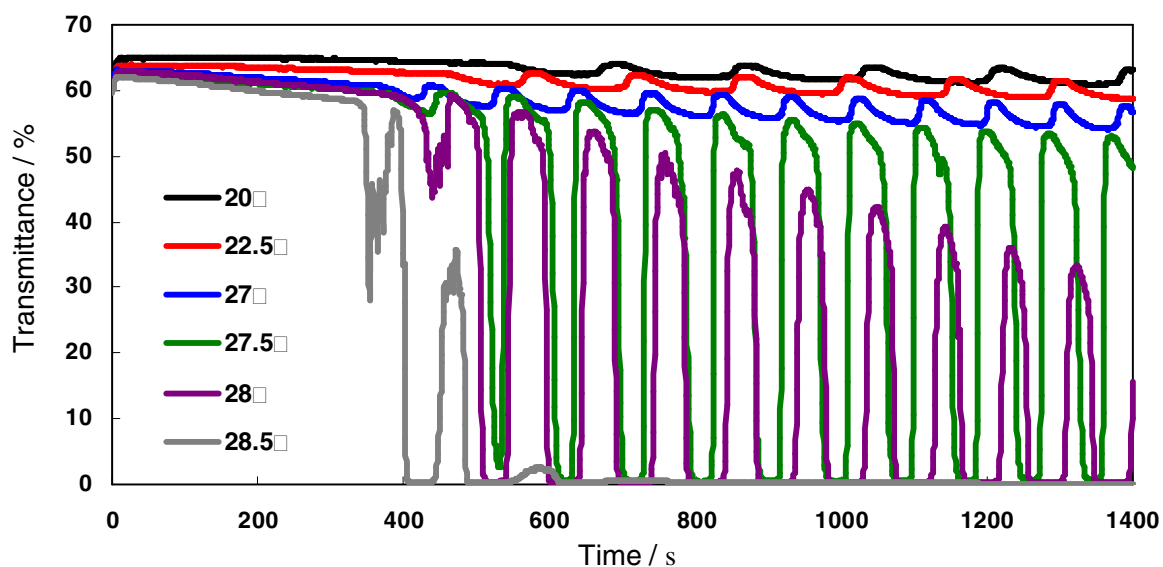

**SI Figure 6.** Self-oscillating profiles of optical transmittance for NRu1(4) microgel dispersions. The microgels (100  $\mu\text{M}$  of  $\text{Ru}(\text{bpy})_3$ ) were dispersed in the aqueous solutions containing MA (62.5 mM),  $\text{NaBrO}_3$  (84 mM), and  $\text{HNO}_3$  (0.3 M). The profiles were measured at the different temperatures: 20  $^{\circ}\text{C}$  (black line), 22.5  $^{\circ}\text{C}$  (red line), 27  $^{\circ}\text{C}$  (blue line), 27.5  $^{\circ}\text{C}$  (green line), 28  $^{\circ}\text{C}$  (purple line) and 28.5  $^{\circ}\text{C}$  (gray line).

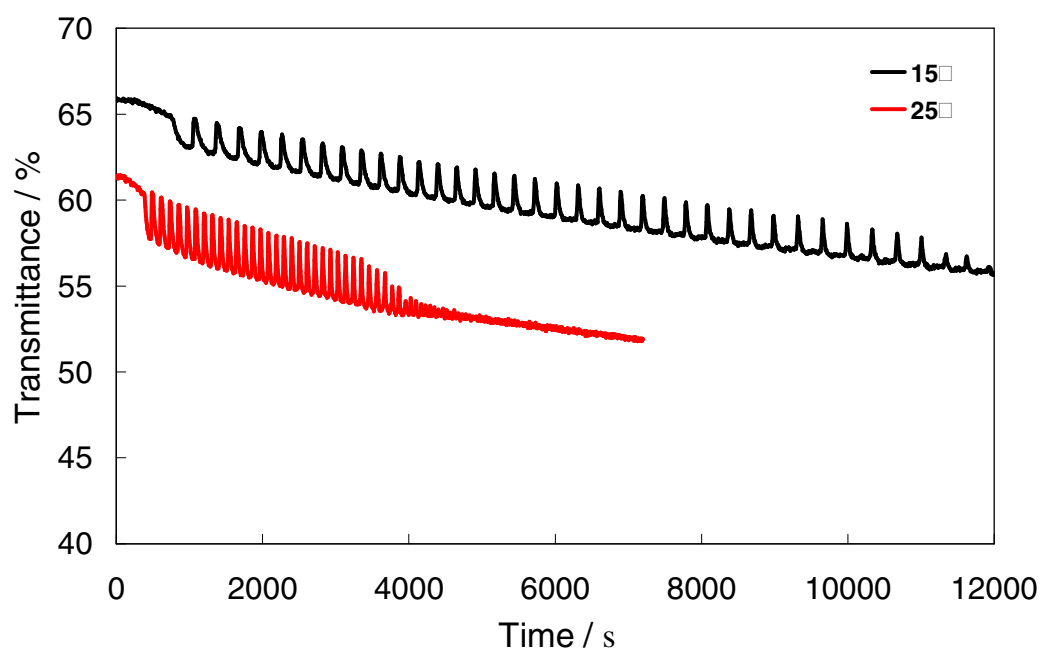

**SI Figure 7.** Typical self-oscillating profiles of optical transmittance for many hours for NRu1(4) microgel dispersions. The microgels (100  $\mu$ M of Ru(bpy)<sub>3</sub>) were dispersed in aqueous solutions containing MA (62.5 mM), NaBrO<sub>3</sub> (84 mM), and HNO<sub>3</sub> (0.3 M). The profiles were measured at the different temperatures: 15 °C (black line) and 25 °C (red line). At the same substrate concentrations, duration of the oscillation at lower temperature (15 °C, ~5 h) is longer than that at higher temperature (25 °C, ~ 1 h).
